# Supplementary material for: Stimuli-responsive helical polymeric particles with amplified circularly polarized luminescence
Source: Royal Society of Chemistry journal article supplement (doi:10.1039/d2tc04292d), 2022-11-28
Supplement: d2tc04292d1.pdf [file d2tc04292d1.pdf]

## Supporting Information

*for*

### **Stimuli-responsive helical polymeric particles with amplified circularly polarized luminescence**

Huimin Duan<sup>ab</sup>, Hongkun Pan<sup>ab</sup>, Jiawei Li<sup>\*abc</sup> and Dongming Qi<sup>\*abc</sup>

<sup>a</sup> *Key Laboratory of Advanced Textile Materials and Manufacturing Technology, Ministry of Education, Zhejiang Sci-Tech University, Hangzhou 310018, P. R. China*

<sup>b</sup> *Zhejiang Provincial Engineering Research Center for Green and Low-carbon Dyeing & Finishing, Zhejiang Sci-Tech University, Hangzhou 310018, P.R. China*

<sup>c</sup> *Zhejiang Provincial Innovation Center of Advanced Textile Technology, Shaoxing, 312000, China.*

## Contents

### Monomer structures characterization.

**Fig. S1 GPC traces of P<sub>55</sub> particles prepared in CH<sub>2</sub>Cl<sub>2</sub>/*n*-heptane with varied ratio: 1/6; 1/7; 1/8; 1/9 (mL/mL).**

**Fig. S2 SEM images and GPC traces (middle) of growth process of the P<sub>55</sub> particles as copolymerization time. Other copolymerization conditions as shown in Table S2.**

**Fig. S3 SEM images of P<sub>55</sub> particles with varied total monomer concentrations (a.  $1.25 \times 10^{-2}$  M; b.  $5 \times 10^{-2}$  M; c.  $10^{-1}$  M; Other copolymerization conditions as shown in Table S3. For  $2.5 \times 10^{-2}$  M, see Fig. 1e), with varied Rh catalyst concentrations (d.  $1.25 \times 10^{-4}$  M; e.  $5 \times 10^{-4}$  M; f.  $10^{-3}$  M; Other copolymerization conditions as shown in Table S4. For  $2.5 \times 10^{-4}$  M, see Fig.1e), and SEM images of copolymeric particles varied feed mass ratio of the two monomers M1/M2 (g. P<sub>2</sub>; h. P<sub>64</sub>; i. P<sub>73</sub>; j. P<sub>82</sub>; k. P<sub>91</sub>; l. P<sub>1</sub>; Other copolymerization conditions as shown in Table S5. For P<sub>55</sub>, see Fig.1e).**

**Fig. S4 GPC traces of P<sub>55</sub> particles with varied total monomer concentrations.**

**Fig. S5 GPC traces of P<sub>55</sub> particles with varied Rh catalyst concentrations.**

**Fig. S6 GPC traces of P<sub>X</sub> particles with the varied feed mass ratio of the two monomers M1/M2.**

**Fig. S7 SEM-EDS mapping of copolymeric particles P<sub>X</sub> with varied M1/M2 (a. P<sub>55</sub>; b. P<sub>64</sub>; c. P<sub>73</sub>; d. P<sub>82</sub>; e. P<sub>91</sub>; Other copolymerization conditions as shown in Table S5. For P<sub>55</sub>, see Fig. S3).**

**Fig. S8 CD and UV–Vis spectra of M1 and M2 (0.5 mM, in CHCl<sub>3</sub>).**

**Fig. S9 Fluorescence excitation spectra of P<sub>55</sub> monitored at 430, 480, 500, 530, 550 and 600 nm.**

**Fig. S10 Fluorescence spectra of M1 and M2 (0.5 mM,  $\lambda_{\text{ex}} = 365$  nm, in CHCl<sub>3</sub>).**

**Fig. S11 Fluorescence spectra of P<sub>55</sub> at different excitation wavelengths.**

**Table S1 Effects of the mixed solvent (CH<sub>2</sub>Cl<sub>2</sub>/*n*-heptane) ratio on copolymerization and formation of particles <sup>a</sup>.**

**Table S2 Copolymerization and growth of P<sub>55</sub> particles <sup>a</sup> with time.**

**Table S3 Effects of total monomer concentration on P<sub>55</sub> particles <sup>a</sup>.**

**Table S4 Effects of Rh catalyst concentration on P<sub>55</sub> particles <sup>a</sup>.**

**Table S5 Effects of feed mass ratio of the two monomers M1/M2 on copolymeric particles <sup>a</sup>.**

### Monomer structures characterization.

Fig. 1a: In the FT-IR spectrum of M1, the characteristics for  $\text{-C}\equiv\text{C}$  bond ( $2124\text{ cm}^{-1}$ ) and amide (I and II,  $1663, 1570\text{ cm}^{-1}$ ) were clearly observed. In the FT-IR spectrum of M2, the characteristics for  $\text{-C}\equiv\text{C}$  bond ( $2121\text{ cm}^{-1}$ ),  $\text{-C-N-}$  bond ( $1151\text{ cm}^{-1}$ ) and  $\text{-S=O}$  bond ( $1333\text{ cm}^{-1}$ ) clearly appeared.

Fig. 1b and 1c: The particular chemical shifts of H and C for  $\text{-HC}\equiv$  ( $\delta_{\text{H}} 2.35\text{ ppm}$ ,  $\delta_{\text{C}} 68.7\text{ ppm}$ ) and  $\text{-(CH}_3)_3$  ( $\delta_{\text{H}} 1.43\text{ ppm}$ ,  $\delta_{\text{C}} 32.8\text{ ppm}$ ) were obviously observed in the  $^1\text{H}$  NMR and  $^{13}\text{C}$  NMR spectrum of M1. And the particular chemical shifts of H and C for  $\text{-HC}\equiv$  ( $\delta_{\text{H}} 1.95\text{ ppm}$ ,  $\delta_{\text{C}} 46.5\text{ ppm}$ ),  $\text{-Ar-H}$  ( $\delta_{\text{H}} 7.34\sim 8.65\text{ ppm}$ ,  $\delta_{\text{C}} 114.6\sim 155.7\text{ ppm}$ ) and  $\text{-N(CH}_3)_2$  ( $\delta_{\text{H}} 2.95\text{ ppm}$ ,  $\delta_{\text{C}} 35.6\text{ ppm}$ ) were obviously presented in the NMR spectrum of M2.

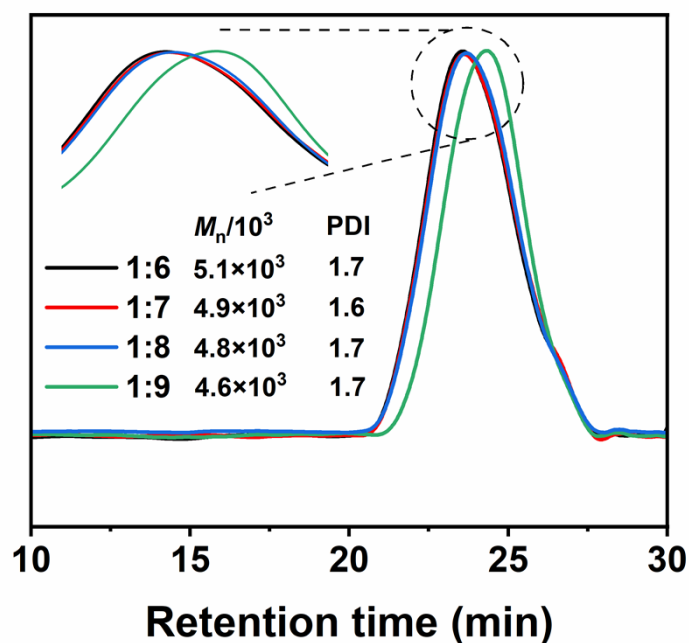

**Fig. S1** GPC traces of  $\text{P}_{55}$  particles prepared in  $\text{CH}_2\text{Cl}_2/n$ -heptane with varied ratio: 1/6; 1/7; 1/8; 1/9 (mL/mL).

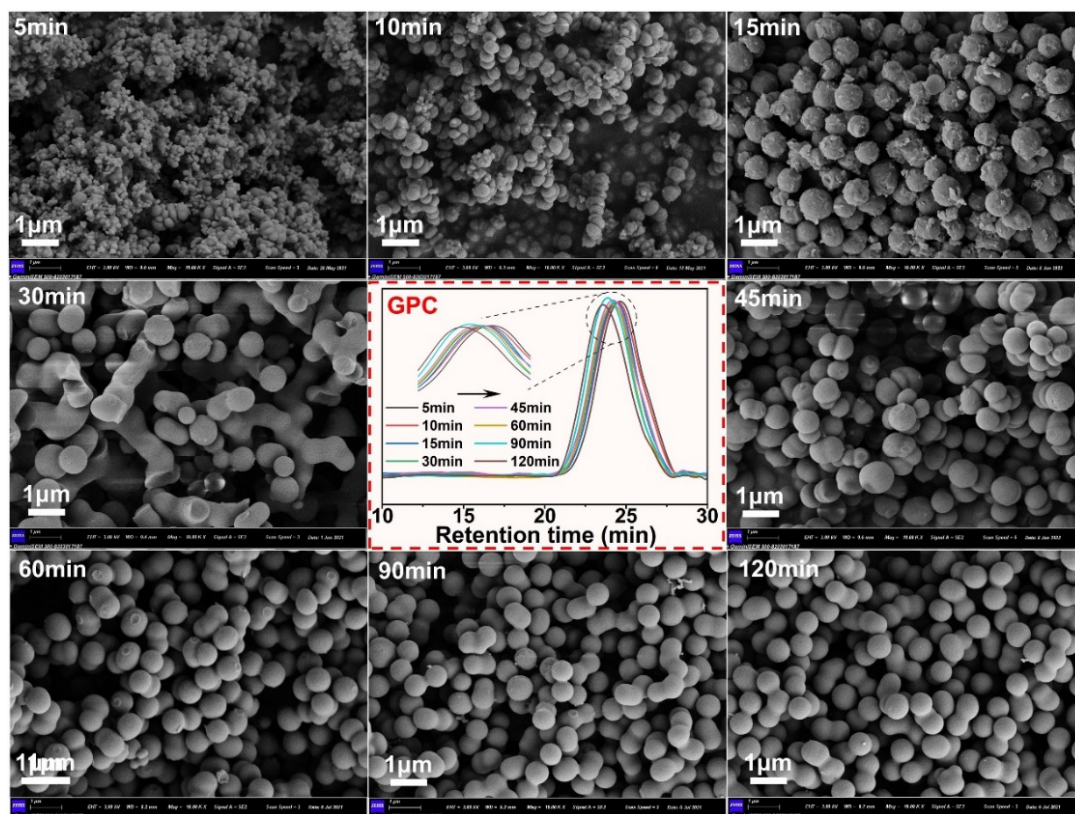

**Fig. S2** SEM images and GPC traces (middle) of growth process of P<sub>55</sub> particles as copolymerization time. Other copolymerization conditions as shown in Table S2.

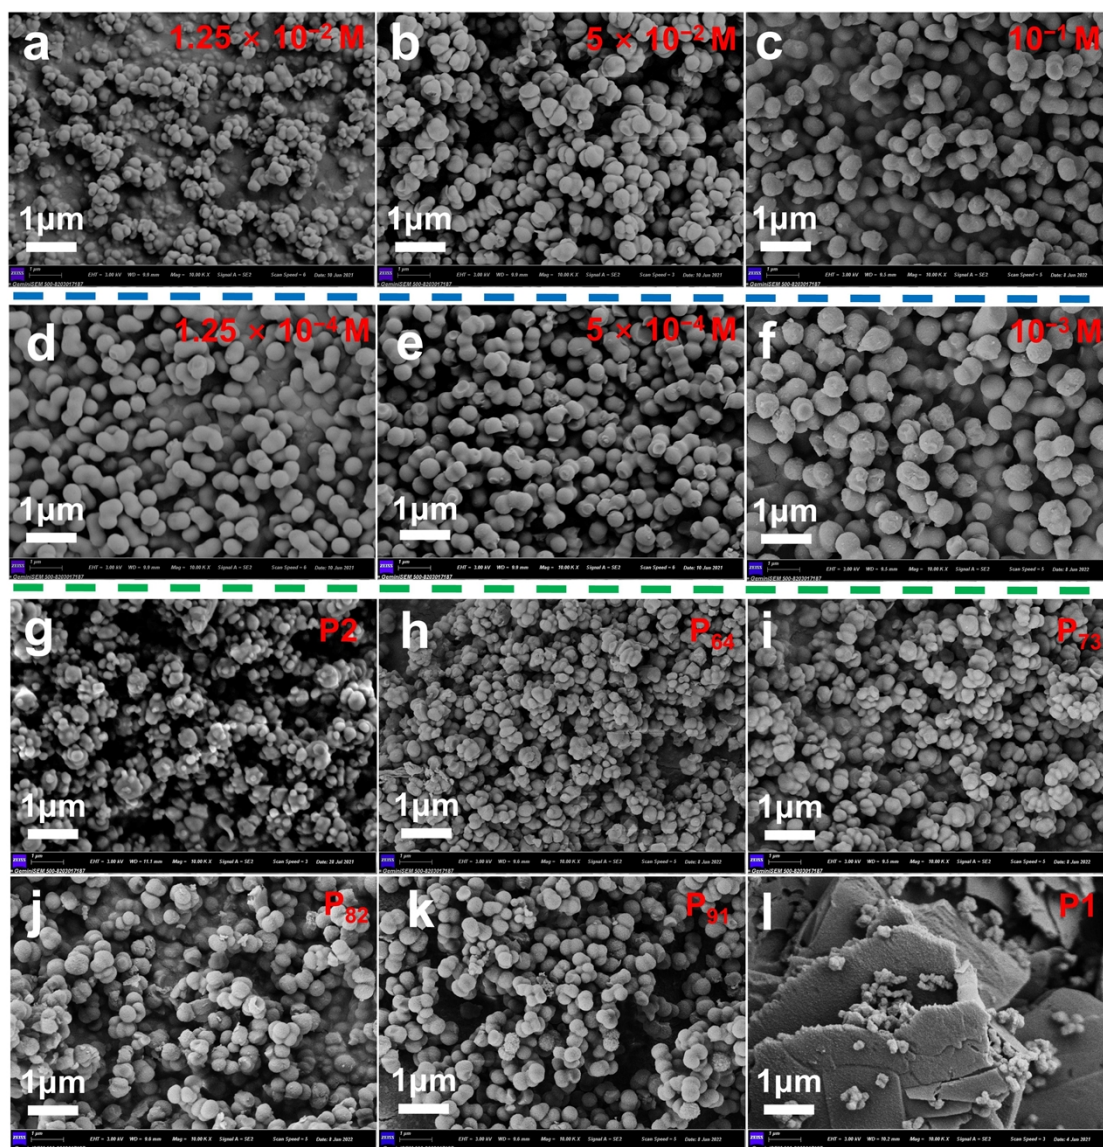

**Fig. S3** SEM images of P<sub>55</sub> particles with varied total monomer concentrations (a.  $1.25 \times 10^{-2}$  M; b.  $5 \times 10^{-2}$  M; c.  $10^{-1}$  M; Other copolymerization conditions as shown in Table S3. For  $2.5 \times 10^{-2}$  M, see Fig. 1e), with varied Rh catalyst concentrations (d.  $1.25 \times 10^{-4}$  M; e.  $5 \times 10^{-4}$  M; f.  $10^{-3}$  M; Other copolymerization conditions as shown in Table S4. For  $2.5 \times 10^{-4}$  M, see Fig. 1e), and SEM images of copolymeric particles varied feed mass ratio of the two monomers M1/M2 (g. P<sub>2</sub>; h. P<sub>64</sub>; i. P<sub>73</sub>; j. P<sub>82</sub>; k. P<sub>91</sub>; l. P<sub>1</sub>; Other copolymerization conditions as shown in Table S5. For P<sub>55</sub>, see Fig. 1e).

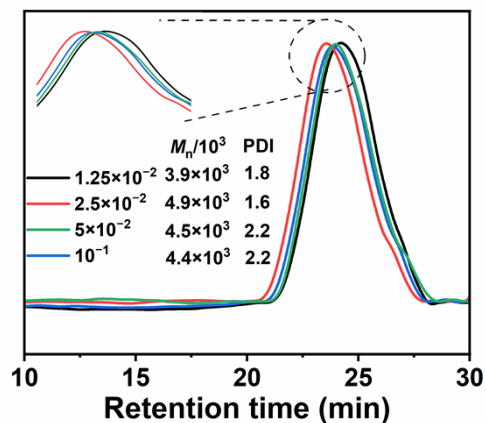

**Fig. S4** GPC traces of P<sub>55</sub> particles with varied total monomer concentrations.

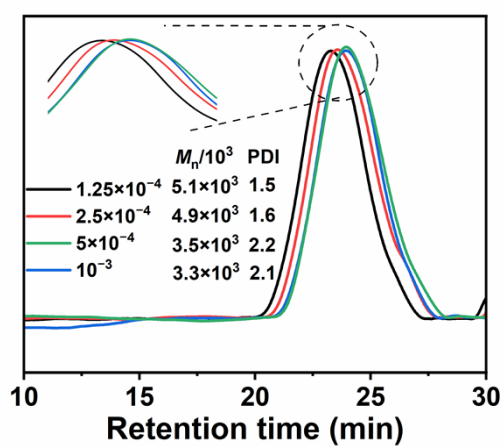

**Fig. S5** GPC traces of P<sub>55</sub> particles with varied Rh catalyst concentrations.

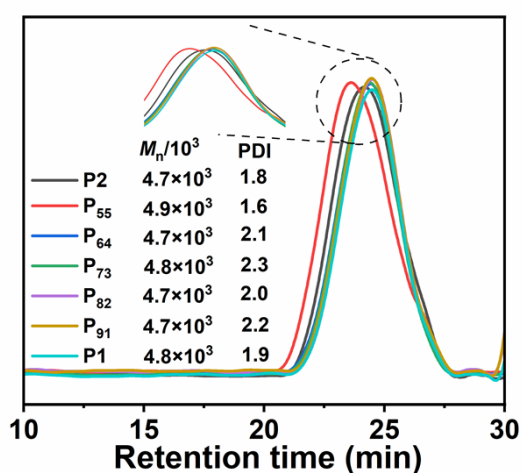

**Fig. S6** GPC traces of P<sub>X</sub> particles with the varied feed mass ratio of the two monomers M1/M2.

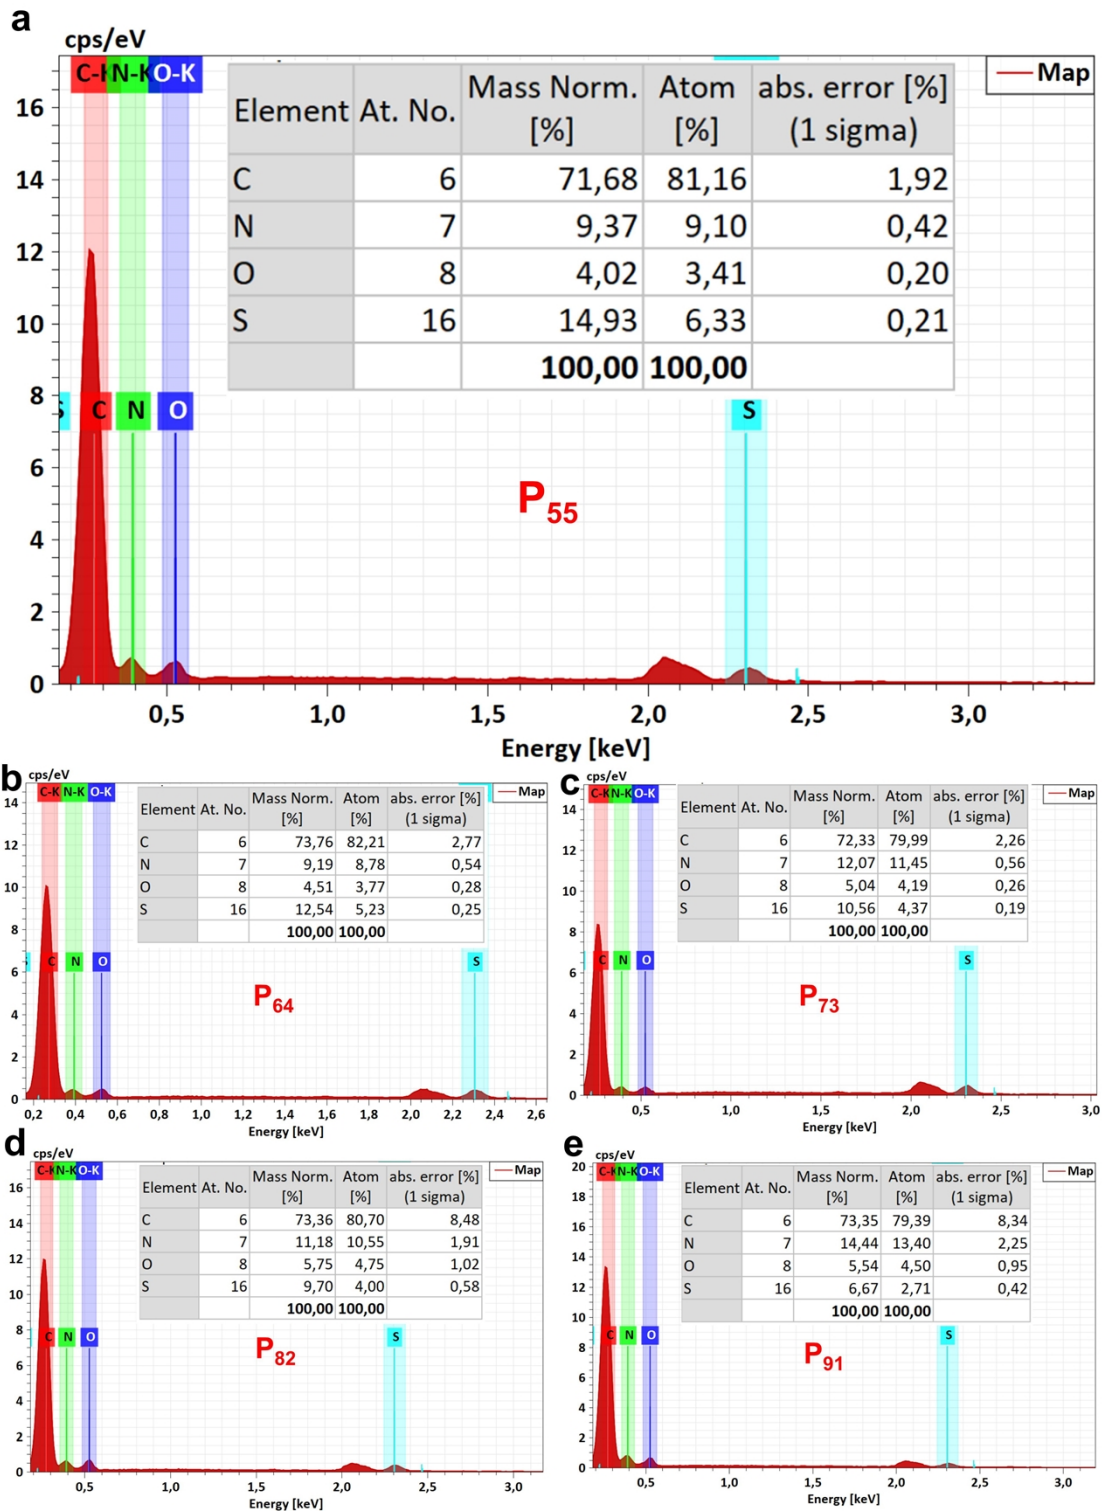

**Fig. S7** SEM-EDS mapping of copolymeric particles  $P_X$  with varied M1/M2 (a.  $P_{55}$ ; b.  $P_{64}$ ; c.  $P_{73}$ ; d.  $P_{82}$ ; e.  $P_{91}$ ; Other copolymerization conditions as shown in Table S5. For  $P_{55}$ , see Fig. S3).



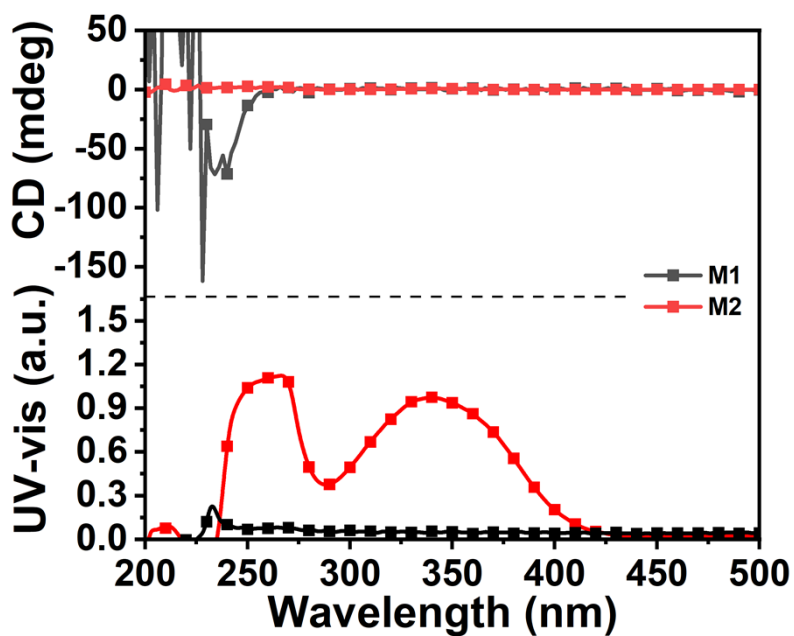

Fig. S8 CD and UV-Vis spectra of M1 and M2 (0.5 mM, in  $\text{CHCl}_3$ ).

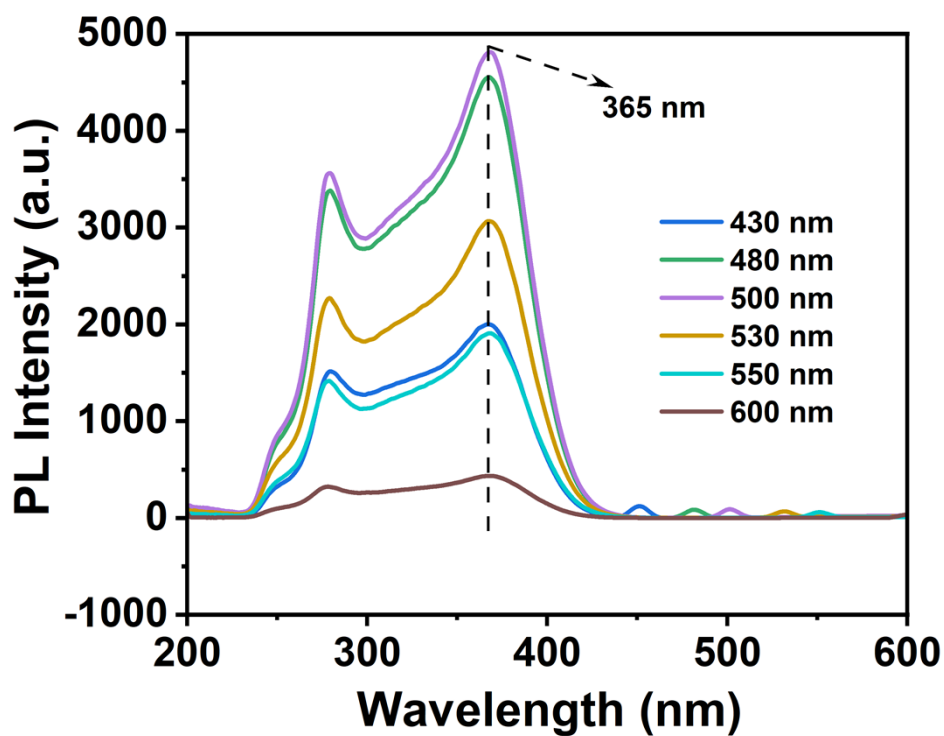

Fig. S9 Fluorescence excitation spectra of  $\text{P}_{55}$  monitored at 430, 480, 500, 530, 550 and 600 nm.

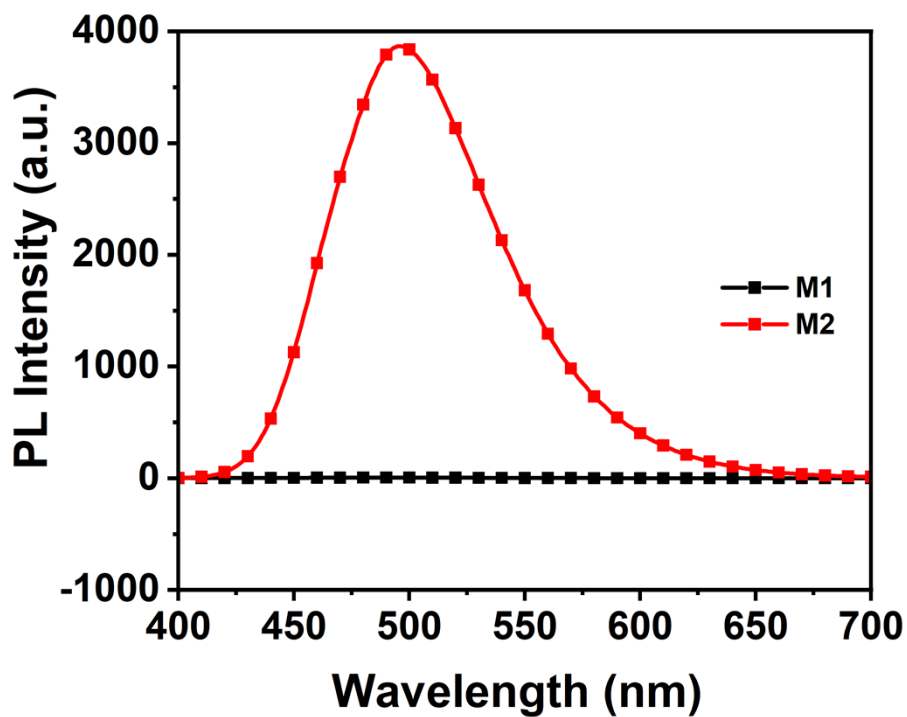

**Fig. S10** Fluorescence spectra of M1 and M2 (0.5 mM,  $\lambda_{\text{ex}} = 365$  nm, in  $\text{CHCl}_3$ ).

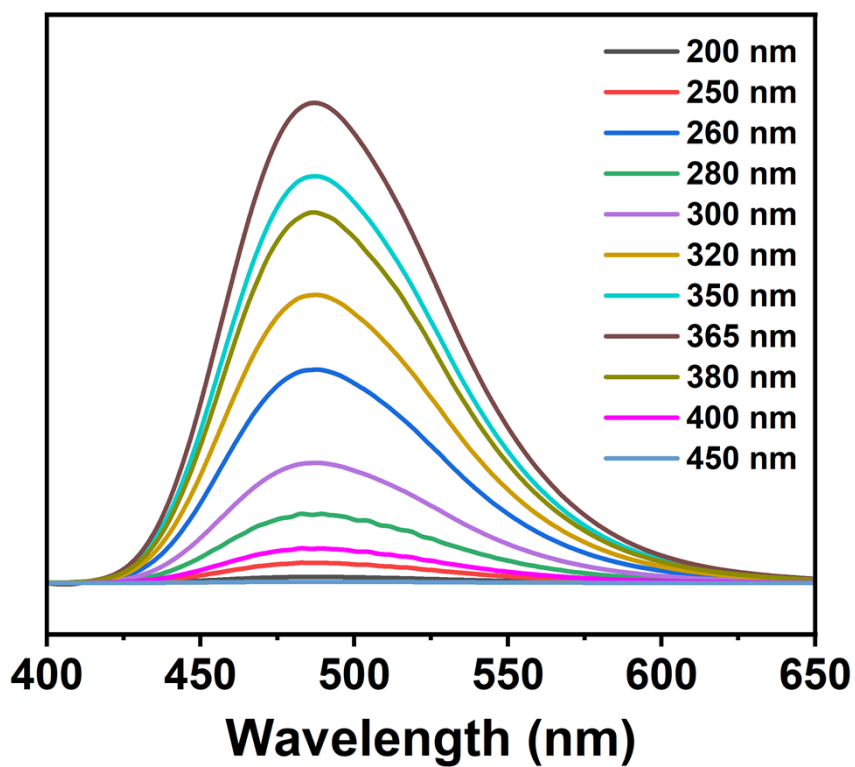

**Fig. S11** Fluorescence spectra of  $\text{P}_{55}$  at different excitation wavelengths.

**Table S1** Effects of the mixed solvent (CH<sub>2</sub>Cl<sub>2</sub>/*n*-heptane) ratio on copolymerization and formation of particles <sup>a</sup>.

| CH <sub>2</sub> Cl <sub>2</sub> / <i>n</i> -heptane<br>(mL/mL) | $M_{n, \text{exp}}^{\text{b}}/10^3$<br>(g·mol <sup>-1</sup> ) | PDI <sup>b</sup> | Yield <sup>c</sup><br>(%) | Particle<br>diam <sup>d</sup> (nm) |
|----------------------------------------------------------------|---------------------------------------------------------------|------------------|---------------------------|------------------------------------|
| 1/6                                                            | 5.1                                                           | 1.7              | 85.4                      | 640                                |
| 1/7                                                            | 4.9                                                           | 1.6              | 87.3                      | 630                                |
| 1/8                                                            | 4.8                                                           | 1.7              | 88.7                      | 610                                |
| 1/9                                                            | 4.6                                                           | 1.7              | 89.2                      | — <sup>e</sup>                     |

<sup>a</sup> Copolymerization was performed under conditions: total concentration of monomers mixture,  $2.5 \times 10^{-2}$  M; [Rh],  $2.5 \times 10^{-4}$  M; at 30 °C for 3 h. <sup>b</sup> Determined by GPC trace and PDI was defined as  $M_w/M_n$ . <sup>c</sup> Determined gravimetrically. <sup>d</sup> Determined by SEM. <sup>e</sup> Only few regular microparticles.

**Table S2** Copolymerization and growth of P<sub>55</sub> particles <sup>a</sup> with time.

| proceed time (min) | $M_{n, \text{exp}}^{\text{b}}/10^3$<br>(g·mol <sup>-1</sup> ) | PDI <sup>b</sup> | Yield<br><sup>c</sup> (%) | Particle<br>diam <sup>d</sup> (nm) |
|--------------------|---------------------------------------------------------------|------------------|---------------------------|------------------------------------|
| 5                  | 4.3                                                           | 1.8              | 35.3                      | — <sup>e</sup>                     |
| 10                 | 4.4                                                           | 1.6              | 56.7                      | — <sup>e</sup>                     |
| 15                 | 4.5                                                           | 1.7              | 63.4                      | — <sup>e</sup>                     |
| 30                 | 4.6                                                           | 1.8              | 78.6                      | — <sup>e</sup>                     |
| 45                 | 4.6                                                           | 1.5              | 79.9                      | — <sup>e</sup>                     |
| 60                 | 4.8                                                           | 1.7              | 85.8                      | 540                                |
| 90                 | 4.9                                                           | 1.6              | 87.2                      | 560                                |
| <b>120</b>         | <b>4.9</b>                                                    | <b>1.6</b>       | <b>87.3</b>               | <b>630</b>                         |

<sup>a</sup> Copolymerization was performed under conditions: total concentration of monomers mixture [M],  $2.5 \times 10^{-2}$  M; [Rh],  $2.5 \times 10^{-4}$  M; CH<sub>2</sub>Cl<sub>2</sub>/*n*-heptane, 1/7 (mL/mL); at 30 °C for 2 h. <sup>b</sup> Determined by GPC trace and PDI was defined as  $M_w/M_n$ . <sup>c</sup> Determined gravimetrically. <sup>d</sup> Determined by SEM. <sup>e</sup> Only few regular particles.

**Table S3** Effects of total monomer concentration on P<sub>55</sub> particles <sup>a</sup>.

| [M]/10 <sup>-2</sup> (M) | $M_{n, \text{exp}}^{\text{b}}/10^3$<br>(g·mol <sup>-1</sup> ) | PDI <sup>b</sup> | Yield<br><sup>c</sup> (%) | Particle<br>diam <sup>d</sup> (nm) |
|--------------------------|---------------------------------------------------------------|------------------|---------------------------|------------------------------------|
| 1.25                     | 3.9                                                           | 1.8              | 85.4                      | — <sup>e</sup>                     |
| <b>2.5</b>               | <b>4.9</b>                                                    | <b>1.6</b>       | <b>87.3</b>               | <b>630</b>                         |
| 5                        | 4.5                                                           | 2.2              | 70.5                      | — <sup>e</sup>                     |
| 10                       | 4.4                                                           | 2.2              | 68.7                      | — <sup>e</sup>                     |

<sup>a</sup> Copolymerization was performed under conditions: [Rh],  $2.5 \times 10^{-4}$  M; CH<sub>2</sub>Cl<sub>2</sub>/*n*-heptane, 1/7 (mL/mL); at 30 °C for 2 h. <sup>b</sup> Determined by GPC. <sup>c</sup> Determined gravimetrically. <sup>d</sup> Determined by SEM. <sup>e</sup> Only few regular particles.

**Table S4** Effects of Rh catalyst concentration on P<sub>55</sub> particles <sup>a</sup>.

| [Rh]/10 <sup>-4</sup> (M) | $M_{n, \text{exp}}^b/10^3$<br>(g·mol <sup>-1</sup> ) | PDI <sup>b</sup> | yield <sup>c</sup><br>(%) | Particle<br>diam <sup>d</sup> (nm) |
|---------------------------|------------------------------------------------------|------------------|---------------------------|------------------------------------|
| 1.25                      | 5.1                                                  | 1.5              | 85.4                      | — <sup>e</sup>                     |
| <b>2.5</b>                | <b>4.9</b>                                           | <b>1.6</b>       | <b>87.3</b>               | <b>630</b>                         |
| 5                         | 3.5                                                  | 2.2              | 88.6                      | — <sup>e</sup>                     |
| 10                        | 3.3                                                  | 2.1              | 87.9                      | — <sup>e</sup>                     |

<sup>a</sup> Copolymerization was performed under conditions: total concentration of monomers mixture [M],  $2.5 \times 10^{-2}$  M; CH<sub>2</sub>Cl<sub>2</sub>/*n*-heptane, 1/7 (mL/mL); at 30 °C for 2 h. <sup>b</sup> Determined by GPC. <sup>c</sup> Determined gravimetrically. <sup>d</sup> Determined by SEM. <sup>e</sup> Only few regular particles.

**Table S5** Effects of feed mass ratio of the two monomers M1/M2 on copolymeric particles <sup>a</sup>.

| Sample<br>NO.   | M1/M2<br>(mg/mg) | $M_{n, \text{exp}}^b/10^3$<br>(g·mol <sup>-1</sup> ) | PDI <sup>b</sup> | Yield <sup>c</sup><br>(%) | Particle<br>diam <sup>d</sup> (nm) | $[\alpha]_D^f$<br>(deg) | $\Phi_F^g$ | $g_{\text{abs}}^h/10^{-2}$ | $g_{\text{lum}}^i/10^{-2}$ |
|-----------------|------------------|------------------------------------------------------|------------------|---------------------------|------------------------------------|-------------------------|------------|----------------------------|----------------------------|
| P1              | 10:0             | 4.7                                                  | 1.9              | 87.9                      | — <sup>e</sup>                     | -1300                   | —          | -1.15                      | —                          |
| P <sub>91</sub> | 9:1              | 4.7                                                  | 2.2              | 84.6                      | 610                                | -1240                   | 7.3        | -0.91                      | -1.333                     |
| P <sub>82</sub> | 8:2              | 4.7                                                  | 2.0              | 85.4                      | — <sup>e</sup>                     | -890                    | 10.5       | -0.68                      | -1.239                     |
| P <sub>73</sub> | 7:3              | 4.8                                                  | 2.3              | 86.5                      | — <sup>e</sup>                     | -560                    | 23.4       | -0.45                      | -1.087                     |
| P <sub>64</sub> | 6:4              | 4.7                                                  | 2.1              | 87.1                      | — <sup>e</sup>                     | -250                    | 30.6       | -0.31                      | -0.970                     |
| P <sub>55</sub> | <b>5:5</b>       | <b>4.9</b>                                           | <b>1.6</b>       | <b>87.3</b>               | <b>630</b>                         | -120                    | 39.8       | -0.23                      | -0.815                     |
| P2              | 0:10             | 4.8                                                  | 1.8              | 88.7                      | — <sup>e</sup>                     | 2                       | 64.3       | —                          | —                          |

<sup>a</sup> Copolymerization was performed under conditions: total concentration of monomers mixture [M],  $2.5 \times 10^{-2}$  M; [Rh],  $2.5 \times 10^{-4}$  M; CH<sub>2</sub>Cl<sub>2</sub>/*n*-heptane, 1/7 (mL/mL); at 30 °C for 2 h. <sup>b</sup> Determined by GPC. <sup>c</sup> Determined gravimetrically. <sup>d</sup> Determined by SEM. <sup>e</sup> Only few regular particles. <sup>f</sup> Measured by polarimetry at 25 °C, c=0.1 g/dL, in CHCl<sub>3</sub>. <sup>g</sup> Absolute fluorescence quantum yield of composite film obtained using the calibrated integrating sphere system. <sup>h</sup> Determined by the CD and UV-vis spectra of composite film. <sup>i</sup> Determined by the CPL spectra of composite film.
